# Supplementary material for: Electro-organic reactions. Part 54. Quinodimethane chemistry. Part 2. Electrogeneration and reactivity of o-quinodimethanes
Source: Royal Society of Chemistry journal article supplement (doi:10.1039/b007476o), 2001-01-01
Supplement: b007476o.doc [file b007476o.doc]

# Supplementary data

**Electrorganic reactions. Part 54. Quinodimethane chemistry. Part2. Electrogeneration and reactivity of *ortho*-quinodimethanes**

**James H.P.Utley,*a** Shalini Ramesh,*a* Xavier Salvatella,*a* Sabine Szunerits,*a* Majid Motevalli*a* and Merete F. Nielsen*b***

*a Department of Chemistry, Queen Mary and Westfield College (University of London), Mile End Road, London, UK E1 4NS*

*b Department of Chemistry, University of Copenhagen, Symbion Science Park, Fruebjergvej 3, DK-2100, Copenhagen, Denmark*

## All formulae numbers refer to figures and schemes in the full paper

### Starting Materials

*1,2-Diphenylbenzene:* Titanium tetrachloride (2.5 ml) was added rapidly to a solution of 1,2-dichloroethane (60 ml) and benzene (40 ml) in a three necked flask (250 ml) equipped with a thermometer, a dropping funnel and a nitrogen inlet. The solution was cooled with an acetone/dry-ice mixture and a solution of 1,2-bis(chloromethyl)benzene (2.0 g, 11.4 mmol) in 1,2-dichloroethane (20 ml) was added slowly. After the addition the mixture was warmed up to room temperature and stirred for 24 hours. Adding methanol (5 ml) stopped the reaction. The solution was washed three times with water, dried (MgSO4) and the solvent evaporated; (1.7 g, 58 %); m.p. 77 C (lit.1 77-79 C); 1H nmr H (80 MHz, CDCl3): 3.93 (4H, s, PhCH2), 7.13-7.25 (14H, m, ArH)

*1,2-Bis(bromobenzyl)benzene* (**1b**)*:*1,2-dibenzylbenzene(1.0 g, 3.8 mmol) and N-bromosuccinimide (1.6 g, 8.9 mmol) were dissolved in dry CCl4. Benzoylperoxide (0.30 g, 1.24 mmol,) was added and the solution was heated under reflux (1 hour) until all the N-bromosuccinimide was converted into succinimide. The succinimide was filtered off and the filtrate evaporated. By adding petroleum ether (40-60 C) yellow crystals were formed; (0.53 g, 66 %); mp 72-74 C (lit.2 74-75 C); 1H nmr H (250 MHz, CDCl3): 6.23 (2H,s, PhCHBr), 7.40-8.10 (14H, m, ArH)

*1-(Hydroxybenzyl)-2-(hydroxyphenylbenzyl)benzene* : Phenyl magnesium bromide, prepared from bromobenzene (26.0 g, 0.17 mol) in dry diethyl ether (ca. 100 ml), was added slowly to a stirred solution of 2-methoxycarbonylbenzaldehyde (2.5 g, 0.017 mol) in dry diethyl ether (50 ml). The mixture was stirred for two hours and then cooled to room temperature. The solution was treated with ice water, the precipitate dissolved in 2 M sulphuric acid, and the product isolated by extraction into ether. After drying (MgSO4) biphenyl was removed by steam distillation of the residue. The remaining residue was dissolved in benzene, washed with water, dried (MgSO4) and the solvent evaporated. Yellow crystals formed and were recrystallised from benzene; (3.41 g, 56 %); mp 155-157 C (lit.3 156.5 C); 1H nmr H (250 MHz, CDCl3): 1.50 (1H, s, OH), 2.23 (1H, s, OH), 6.25 (1H, s, PhCH(OH)Ar), 7.23-7.98 (19H, m, ArH)

*2-Methyl-2-sodium-indan-1,3-dione*: A mixture of dimethyl phthalate (5.0 g, 25 mmol) and sodium wire (1.5 g, 66 mmol) was heated to reflux (120 C) and ethyl propionate (3.0 g, 29 mmol) added at reflux until a dark-red crystalline matrix formed (ca. 2 hours). The mixture was washed with ethanol and diethyl ether several times and finally recrystallised from hot water; (3.05 g, 65 %); m.p. 69-70 C; 1H NMR H (80 MHz, d6-acetone): 1.59 (3H, s, CH3), 7.06 (4H, s, ArH)

*2,2-Dimethyl-indan-1,3-dione:* 2-Methyl-2-sodium-indandion-1,3 (2.5 g, 13.7 mmol) in methanol (20 ml) was added to methyl iodide (1.9 g, 13.3 mmol) and sealed in a reaction tube under vacuum. The tube was heated to 100 C for four hours in a tube oven and then cooled slowly to room temperature. The orange solution was diluted with water, shaken with diethyl ether, dried (MgSO4) and the solvent evaporated. Crystals formed immediately and were recrystallised from ethanol:water (1:1); (1.54 g, 79 %); mp 107 C (lit4 107-108 C); 1H NMR H (80 MHz, CDCl3): 1.31 (6H, s, CH3), 7.79-8.08 (4H, m, ArH)

*1,3-Diphenyl-2,2-dimethyl-1,3-dihydroxy-indan:*  Phenyl magnesium bromide, prepared from bromobenzene (3.9 g, 0.2 mol) in dry diethyl ether (50 ml), was added slowly to a solution of 2,2-dimethyl-indandion-1,3 (1.5 g, 0.014 mol) in dry diethyl ether (50 ml). After the Grignard reagent had been added the mixture was stirred for another hour and then cooled to room temperature. The solution was treated with ice water, the precipitate dissolved in 2 M sulphuric acid, extracted with ether, dried (MgSO4) and the solvent evaporated. Biphenyl was removed by steam distillation and the remaining residue dissolved in ether, washed (H2O), dried (MgSO4) and the solvent evaporated. Yellow crystals formed; (2.35 g, 73 %); mp 110-112 C (lit5 111C); 1H NMR H (250 MHz, CDCl3): 1.31 (6H, s, CH3), 2.20 (2H, s, OH), 7.31-8.05 (14H, m, ArH)

*1,3-Diphenyl-2,2-dimethyl-1,3-dibromo-indan* (**3**)**:** 1,3-Diphenyl-2,2-dimethyl-1,3-dihydroxy-indan (1.0 g, 3.3 mmol) was dissolved with warming in glacial acetic acid (20 ml) and HBr (5 ml in HOAc (45 %)) added slowly, the mixture heated to reflux at 120 C for an hour, cooled to room temperature, diluted with water (50 ml) and shaken with chloroform. The organic layer was washed with water, dried (MgSO4) and the solvent evaporated. Column chromatography on silica-gel (CHCl3) gave yellow crystals; (1.19 g, 79 %); mp 83-84 C (lit.5 85 C); 1H NMR H (250 MHz, CDCl3): 1.32 (6H, s, CH3), 7.30-8.09 (14H, m, ArH)

*4-Carboxymethylbenzophenone:* 4-Benzoylbenzoic acid (1 g, 4.46 mmol) was dissolved in 1,2-dichloromethane (20 ml) and methanol (20 ml). Concentrated H2SO4 (0.5 ml) was added and the mixture heated under reflux (3 hours). The organic layer was washed with water, saturated aqueous sodium bicarbonate and water, dried (MgSO4) and the solvent evaporated. White crystals were formed immediately. Recrystallisation from hexane; (0.66 g, 62 %); mp 109°C (lit.6 108-109 °C); 1H NMR H (80 MHz, CDCl3) :4.03 (3H, s, CH3O), 7.54-8.28 (9H, m, ArH)

*1,4-Dimethoxy-2,3-dimethylbenzene* : 2,3-Dimethylhydroquinone (2.50 g, 0.02 mol) in DMSO (15 ml) was added to a suspension of finely powdered KOH (8.5 g, 0.15 mol) in DMSO (30 ml), under nitrogen, using a syringe *via* a septum. Methyl iodide (5 ml, 0.08 mol) was added immediately. The red mixture became warm and was cooled with a water bath to 20 C and after 30 minutes the reaction was quenched by pouring into water (150 ml). The white precipitate was filtered off and recrystallisation (MeOH-H2O) gave a white solid; (2.73 g, 91 %); mp. 78-79 C (lit.7 78-79 C); 1H NMR H (80 MHz, CDCl3): 2.20 (6H, s, ArCH3), 3.80 (6H, OCH3), 6.70 (2H, s, ArH).

*2,3-Bis(bromomethyl)1,4-dimethoxybenzene* (**1d**). 1,4-Dimethoxy-2,3-dimethylbenzene (2 g, 0.012 mol) in CCl4 (50 ml) was reacted with NBS (4.70 g, 0,027 mol) in the usual way, in the presence of a catalytic amount of benzoyl peroxide. Recrystallisation from CH2Cl2 and petroleum ether gave a white solid; (2.75, 71 %); mp. 153 C (lit7 149 C), 1H NMR H (80 MHz, CDCl3): 3.87 (6H, s, OCH3), 4.75 (4H, s, CH2Br), 6.85 (2H, s, ArH)

*(E)-But-2-enedioic acid diphenyl ester (diphenyl fumurate)* (**16b**): Fumaryl chloride (1.4 ml, 0.013 mol) was added with a syringe *via* a septum to a solution of phenol (2.45 g, 0.026 mol) in dry toluene (10 ml). After 5 hours of reflux the solution was cooled to room temperature, the solid product filtered and washed with toluene. Recrystallisation from toluene and then petroleum ether gave the pure product; (1.86, 53 %);mp. 161-162 C (lit8 160-162 C), 1H NMR H (80 MHz, CDCl3): 7.0-7.3 (m, ArH&CH2=CH2), ir: 3095 (CH), 1734 (CO), 1262 (COC)

*(Z)-But-2-enedioic acid diphenyl ester (diphenyl maleate)* (**15b**): Maleic anhydride (0.7 g, 7 mmol), phenol (3.2 g, 66 mmol) and polyphosphoric acid were mixed and stirred in a round bottom flask. After 8 hours at 100 C the orange viscous liquid was cooled down too room temperature and water (75 ml) was added. The mixture was stirred. After three minutes the brown solid was filtered. Crystallisation from toluene and petroleum ether gave the product; (0.82 g, 42 %), mp. 70-71 C (lit9 71-72 C), 1H NMR H (80 MHz, CDCl3): 6.65 (2H, s, CH), 7.10-7.50 (10H, m, ArH)

| Table 1. 1H and 13C NMR data for the adduct *trans*-**17** (R1=H, R2=Ph, X=OMe)  [see formula **17** for numbering] | | | | | | | |
| --- | --- | --- | --- | --- | --- | --- | --- |
| **H/ppm** | **number** | **multiplicity** | **protons** | **C/ppm** | **carbon** | **C/ppm** | **carbon** |
| 2.74 | 2 | dd | 1-Hax | 26.7 | 1 | 150.8 | 11 |
| 3.28 | 2 | t | 2-H | 41.9 | 2 | 151.1 | 8 |
| 3.51 | 2 | dd | 1-Heq | 55.7 | 3 | 173.4 | 10 |
| 3.83 | 6 | s | 3-H | 107.6 | 4 |  |  |
| 6.71 | 2 | s | 4-H | 121.7 | 5 |  |  |
| 7.14 | 4 | d | 5-H | 124.0 | 9 |  |  |
| 7.22 | 2 | t | 6-H | 126.0 | 7 |  |  |
| 7.38 | 4 | t | 7-H | 129.5 | 6 |  |  |

| Table 2. 1H and 13C NMR data for the adduct *cis*-**17** (R1=H, R2=Ph, X=OMe)  [see formula **17** for numbering] | | | | | | | | |
| --- | --- | --- | --- | --- | --- | --- | --- | --- |
| **H/ppm** | **number** | **multiplicity** | **J/Hz** | **proton** | **C/ppm** | **carbon** | **C/ppm** | **carbon** |
| 3.14 | 2 | dd | J1ax,1eq=18, J1ax,2=5.5 | 1-Hax | 24.2 | 1 | 150.8 | 11 |
| 3.40 | 2 | dd | J1ax,1eq=18, J1ax,2=6.5 | 1-Heq | 40.3 | 2 | 151.4 | 8 |
| 3.58 | 2 | t | J1ax,2=5.5, J1eq,2=6.5 | 2-H | 55.7 | 3 | 171.6 | 10 |
| 3.82 | 6 | s |  | 3-H | 107.4 | 4 |  |  |
| 6.68 | 2 | s |  | 4-H | 121.7 | 5 |  |  |
| 7.06 | 4 | d | J5,6=7.5 | 5-H | 124.2 | 9 |  |  |
| 7.20 | 2 | t | J7,6=6.5 | 7-H | 125.9 | 7 |  |  |
| 7.34 | 4 | t |  | 6-H | 129.4 | 6 |  |  |

| Table 3. Physical and spectroscopic data for electrolysis products | | | |
| --- | --- | --- | --- |
| product | mp/C | FTIR/cm-1 | H (250 MHz, CDCl3) |
| **6** | *ca*. 85 (lit.10 85) | 3058 (m,*v*arom C-H), 2920 (s, *v*sat.C-H), 1489 (s, benzene ring), 754(s, Ar-H, 4 adjacent H) | 2.80 (4H, s, CH2), 7.07 (4 H, s, ArH) |
| **7** | 109 (lit.11 112-112.5) |  | 3.06 (8H, s, CH2), 6.98-7.00 (8H, s, ArH); |
| **8** | 93-95 (lit.10 94-95) | 2944, 2851 (s, *v*sat.C-H), 1507 (s, benzene ring), 1463 (s, C-H), 722 (s,Ar-H, 5 adjacent H) | 4.46 (2H, s, PhCH), 7.28-7.40 (14H, m,ArH) |
| **10** | 84-86 (lit12 82-86); | 3023 (m, *v*arom C-H),1748 (s, *v*CO), 1660(s, benzene ring),, 1275, 703 (s,Ar-H, 5 adjacent H) | 6.10 (1H,s, CH), 7.01-7.79 (19H, m, ArH); |
| **11** | 132 | 3012 (m,*v*arom C-H), 2956 (s, *v*sat.C-H), 1596 (s, benzene ring), 705 (s, Ar-H, 4 adjacent H) | 1.74 (6H, s, CH3), 4.8 (2H, s, CH), 6.95-7.64 (14H, m, ArH); |
| **14** | >300 | 3054 (m,*v*arom C-H), 2926 (s, *v*sat.C-H), 1743 (s, *v*CO), 1503 (s, benzene ring), 1090 (m, CO), 703(s, Ar-H, 4 adjacent H) | 1.90 (6H, s, CH3), 1.31 (6H, s, CH3), 7.39-8.09 (14H, m, ArH) |
| **13** | 68-70 (lit.13 70); | 3021 (m,*v*arom C-H), 2987 (m, *v*sat.C-H), 1748 (s, *v*CO), 1597 (s, benzene ring), 1275, 703(s, Ar-H, 4 adjacent H) | 1.73 (6H, d, J = 10 Hz, CH3) 6.83-7.01 (4H,m, ArH), 7.07-7.55 (10H, m, ArH); |

| Table 4. Mass spectrometric data for selected products (see text) | | | | |
| --- | --- | --- | --- | --- |
| **product** | **fragment** | **m/z** | **m/z calculated** | **intensity (%)** |
| **10** | C26H20O+ | 348.1498 | 348.1505 | 100 |
|  | C20H15O+ | 271.1129 | 271.1074 | 40 |
| **11** | C23H22+ | 299.1709 | 299.1722 | 100 |
| **14** | C29H26O3+ | 422.1873 | 422.1869 | 89.4 |
| **13** | C23H20O+ | 312.1517 | 312.1465 | 41 |

Reference List

1. H. Bredereck, G. Lehmann, E. Schonfeld, and E. Fritzsche, *Chem.Ber.*, 1939, **72**, 1414.

2. K. A. Azam, M. A. Hashem, A. B. Kazi, A. H. Molla, and S. S. Ullah, *Indian J.Chem.Sect B*, 1988, **27**, 662.

3. H. Simonis and P. Remmert, *Chem.Ber.*, 1915, 206.

4. W. Wislicenus and A. Kotzle, *Liebigs Ann.*, 1889, **252**, 86.

5. K. Alder and M. Fremery, *Tetrahedron*, 1961, **14**, 190.

6. P. J. Wagner and E. J. Siebert, *J.Amer.Chem.Soc.*, 1981, **103**, 7329.

7. D. McHale, *J.Chem.Soc.*, 1959, 3358.

8. S. M. Spatz, *J.Org.Chem.*, 1961, **26**, 4158.

9. A. R. Bader and A. D. Kontowicz, *J.Amer.Chem.Soc.*, 1953, **75**, 5416.

10. F. H. Covitz, *J.Amer.Chem.Soc.* , 1967, **11**, 5403.

11. L. A. Errede, *J.Amer.Chem.Soc.* , 1961, **83**, 949-954.

12. T. Paul, M. A. Hassan, H. Korth, and R. Sustmann, *J.Org.Chem.*, 1996, **61**, 6835.

13. A. Schonberg and M. Mamluk, *Chem.Ber.*, 1973, **106**, 849.
