# Supplementary material for: Electro-organic reactions. Part 54. Quinodimethane chemistry. Part 2. Electrogeneration and reactivity of o-quinodimethanes
Source: Royal Society of Chemistry journal article supplement (doi:10.1039/b007476o), 2001-01-01
Supplement: b007476o_2.doc [file b007476o_2.doc]

# Supplementary data

**Electrorganic reactions. Part 54. Quinodimethane chemistry. Part2. Electrogeneration and reactivity of *ortho*-quinodimethanes**

*James H.P.Utleya*, Shalini Ramesha, Xavier Salvatellaa, Sabine Szuneritsa, Majid Motevallia and Merete F. Nielsenb*

*a Department of Chemistry, Queen Mary and Westfield College (University of London), Mile End Road, London, UK E1 4NS*

*b Department of Chemistry, University of Copenhagen, Symbion Science Park, Fruebjergvej 3, DK-2100, Copenhagen, Denmark*


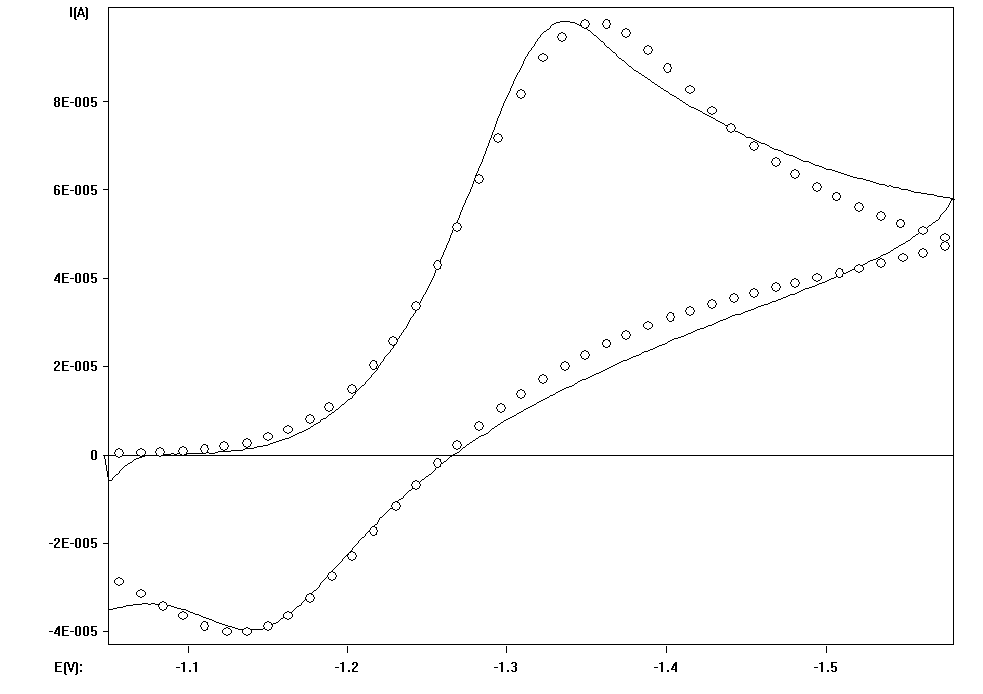
Dimethyl maleate 2 mM 30 V/s

[Experimental - solid line; simulation – circles]

A + e = B (kf)

B + B = C (K)

| -Estart | -Eswitch | -Eend |  (V/s) | -E0 |  | ks (cm/s) | DA (cm2/s) | Cinit (M) | K |
| --- | --- | --- | --- | --- | --- | --- | --- | --- | --- |
| 1.05  (V vs. Ag wire) | 1.58 | 1.05 | 30 | 1.234 | 0.5 | 0.04147 | 6.9 x 10-5  (measured) | 0.002 | 108 |

kf = 12390 M-1 s-1
